# Supplementary material for: Reduction of Cr(VI) by Synergistic Effects of Iron-Rich Biochar and Pseudomonas aeruginosa
Source: MDPI journal article supplement (doi:10.3390/w15061159), 2023-03-16
Supplement: s1 [file s1]

Archive with 1 entries (1 files):
- water-2248376-supplementary.pdf
